## 1 **Main Manuscript**

### 2 **IBEX – A versatile multi-plex optical imaging approach for deep phenotyping and spatial** 3 **analysis of cells in complex tissues**

4 Andrea J. Radtke<sup>1,11,\*</sup>, Evelyn Kandov<sup>1,2,11</sup>, Bradley Lowekamp<sup>3</sup>, Emily Speranza<sup>4,5</sup>, Colin J. Chu<sup>4</sup>,  
5 Anita Gola<sup>4,6</sup>, Nishant Thakur<sup>4</sup>, Rochelle Shih<sup>1,6</sup>, Li Yao<sup>7</sup>, Ziv Rafael Yaniv<sup>3</sup>, Rebecca T. Beuschel<sup>4</sup>,  
6 Juraj Kabat<sup>8</sup>, Joshua Croteau<sup>9</sup>, Jeremy Davis<sup>10</sup>, Jonathan M. Hernandez<sup>10</sup>, and Ronald N.  
7 Germain<sup>1,4,\*</sup>

8 <sup>1</sup>Center for Advanced Tissue Imaging, Laboratory of Immune System Biology, NIAID, NIH,  
9 Bethesda, MD, USA

10 <sup>2</sup>Vanderbilt University School of Medicine, Nashville, TN, USA

11 <sup>3</sup>Bioinformatics and Computational Bioscience Branch, NIAID, NIH, Bethesda, MD, USA

12 <sup>4</sup>Lymphocyte Biology Section, Laboratory of Immune System Biology, NIAID, NIH, Bethesda, MD,  
13 USA

14 <sup>5</sup>Innate Immunity and Pathogenesis Section, Laboratory of Virology, NIAID, NIH, Hamilton, MT,  
15 USA

16 <sup>6</sup>The Rockefeller University, New York, NY, USA

17 <sup>7</sup>Howard Hughes Medical Institute, Chevy Chase, MD, USA

18 <sup>8</sup>Biological Imaging Section, Research Technologies Branch, NIAID, NIH, Bethesda, MD, USA

19 <sup>9</sup>BioLegend, Inc., San Diego, CA, USA

20 <sup>10</sup>Surgical Oncology Program, Metastasis Biology Section, Center for Cancer Research, National  
21 Cancer Institute, NIH

22 <sup>11</sup>Co-first authors

23 \*Co-corresponding authors: Andrea Radtke ([andrea.radtke@nih.gov](mailto:andrea.radtke@nih.gov)); Ronald Germain,  
24 ([rgermain@niaid.nih.gov](mailto:rgermain@niaid.nih.gov))

25 Andrea J. Radtke: 0000-0003-4379-8967, Emily Speranza: 0000-0003-0666-4804, Colin J. Chu:  
26 0000-0003-2088-8310, Ziv Rafael Yaniv: 0000-0003-0315-7727, Ronald N. Germain: 0000-0003-  
27 1495-9143.

### 28 **Classification**

29 Biological Sciences, Immunology, and Inflammation

### 30 **Keywords**

31 High dimensional imaging, immune system, quantitative microscopy, tissue immunity

### 32 **Author Contributions**

33 A.J.R and R.N.G. wrote the manuscript. A.J.R, E.K., B.L, C.J.C., E.S., A.G., N.T., R.S., Z.R.Y,  
34 R.T.B., and J.K designed, performed, and analyzed experiments. L.Y. and A.G. assisted with  
35 display items. J.C., J.D., and J.M.H. provided technical insight, reagents, and tissues. All authors  
36 helped write the manuscript.

37

## 38 **Abstract**

39

40 The diverse composition of mammalian tissues poses challenges for understanding the  
41 cell-cell interactions required for organ homeostasis and how spatial relationships are perturbed  
42 during disease. Existing methods such as single-cell genomics, lacking a spatial context, and  
43 traditional immunofluorescence, capturing only 2-6 molecular features, cannot resolve these  
44 issues. Imaging technologies have been developed to address these problems, but each  
45 possesses limitations that constrain widespread use. Here we report a new method that overcomes  
46 major impediments to highly multi-plex tissue imaging. Iterative Bleaching Extends multi-pleXity  
47 (IBEX) uses an iterative staining and chemical bleaching method to enable high resolution imaging  
48 of >65 parameters in the same tissue section without physical degradation. IBEX can be employed  
49 with various types of conventional microscopes and permits use of both commercially available and  
50 user-generated antibodies in an 'open' system to allow easy adjustment of staining panels based  
51 on ongoing marker discovery efforts. We show how IBEX can also be used with amplified staining  
52 methods for imaging strongly fixed tissues with limited epitope retention and with oligonucleotide-  
53 based staining, allowing potential cross-referencing between flow cytometry, Cellular Indexing of  
54 Transcriptomes and Epitopes by Sequencing (CITE-Seq), and IBEX analysis of the same tissue.  
55 To facilitate data processing, we provide an open source platform for automated registration of  
56 iterative images. IBEX thus represents a technology that can be rapidly integrated into most current  
57 laboratory workflows to achieve high content imaging to reveal the complex cellular landscape of  
58 diverse organs and tissues.

## 59 **Significance Statement**

60 Single cell flow cytometry and genomic methods are rapidly increasing our knowledge of  
61 the diversity of cell types in metazoan tissues. However, suitably robust methods for placing these  
62 cells in a spatial context that reveal how their localization and putative interactions contribute to  
63 tissue physiology and pathology are still lacking. Here we provide a readily accessible pipeline  
64 (IBEX) for highly multi-plex immunofluorescent imaging that enables a fine-grained analysis of cells  
65 in their tissue context. Additionally, we describe extensions of the IBEX workflow to handle hard to  
66 image tissue preparations and a method to facilitate direct integration of the imaging data with flow  
67 cytometry and sequencing technologies.

68

## 69 **Introduction**

70 Mammalian tissues are composed of a wide variety of cell types, presenting a major  
71 challenge to understanding the cell-cell interactions required for homeostasis as well as the  
72 compositional changes associated with disease. To address this complexity, several multi-plexed

73 imaging methods utilizing conventional microscopes and commercially available antibodies have  
74 been described to overcome the target detection limitations of conventional immunohistochemistry  
75 (IHC) or immunofluorescence (IF) imaging (1-8). The majority of these methods generate high  
76 dimensional datasets through an iterative, multi-step process (a cycle) that includes: 1)  
77 immunolabeling with antibodies, 2) image acquisition, and 3) fluorophore inactivation or  
78 antibody/chromogen removal. While these methods are capable of generating high dimensional  
79 datasets, they are greatly limited by the number of markers visualized per cycle, length of time  
80 required for each cycle, or involve special fluid-handling platforms not generally available to most  
81 laboratories (1). Commercial systems based on the co-detection by indexing (CODEX) method (9)  
82 have facilitated the acquisition of multi-plex imaging data by providing a fully automated instrument  
83 for cyclic imaging. Despite this advancement, the proprietary nature of this method imposes  
84 constraints on the reagents available for use as well as the number of markers to be imaged for  
85 each round. Furthermore, cyclic imaging methods that employ a small number of markers per cycle  
86 (<3) may result in tissue loss due to the stress of repeated fluid exchanges. To this end, novel  
87 imaging techniques such as multi-plexed ion beam imaging (MIBI) (10) and imaging mass  
88 cytometry (IMC) (11) enable the capture of multi-parameter data without cyclic imaging. However,  
89 both of these methods require specialized instrumentation and consumables, with the latter often  
90 again limited in breadth to choices made by the supplier, not the investigator. This constrains their  
91 capacity for broadly analyzing human or experimental animal tissues with respect to lists of  
92 validated antibodies, the ability to work across various established protocols for tissue processing,  
93 and the capacity for real time changes to the epitope target list based on data emerging from high  
94 content methods such as single cell RNA sequencing (scRNA-Seq).

95 To facilitate the increasing need for high content analysis of tissues for projects such as  
96 the Human Cell Atlas and others, the field needs a fully open and extensible method for multi-plex  
97 imaging. Our laboratory has extensively characterized murine and human immune responses using  
98 quantitative multi-parameter imaging of fixed frozen samples (12-18). Importantly, this method of  
99 tissue fixation preserves tissue architecture and cellular morphology, is archivable, compatible with  
100 large volume imaging (19), and in its optimal form, eliminates technical challenges posed by  
101 formalin-fixed paraffin embedded (FFPE) samples. Leveraging this experience and our original  
102 single cycle histo-cytometry method for multi-plex data acquisition (12), we have now developed  
103 Iterative Bleaching Extends multi-pleXity (IBEX). This imaging technique reduces the time per  
104 cycle, uses a high number of antibodies per cycle, employs widely available reagents and  
105 instruments, provides open source software for image alignment, and minimizes physical damage  
106 to the tissue during multiple imaging cycles. Beyond the basic IBEX workflow, we have developed  
107 extensions to achieve multi-parameter imaging of heavily fixed tissues with limited retention of  
108 target epitopes and have incorporated commercially available oligonucleotide-conjugated  
109 antibodies to enable direct cross-comparisons to flow cytometry and scRNA-Seq data obtained by

110 the Cellular Indexing of Transcriptomes and Epitopes by Sequencing (CITE-Seq) method (20). In  
111 addition to describing the specifics of the IBEX method, we provide multiple examples of the use  
112 of IBEX to analyze both immune and parenchymal cells in a diverse array of mouse and human  
113 tissues to illustrate the general applicability of the method. The IBEX method described here can  
114 be rapidly integrated into current laboratory workflows to obtain high dimensional imaging datasets  
115 of a wide range of animal and human tissues.

116

## 117 **Results**

118

### 119 **IBEX builds and improves upon existing iterative imaging techniques**

120 Iterative imaging methods typically use either fluorophore bleaching or  
121 antibody/chromogen removal to achieve multi-parameter datasets (1-8). Due to the harsh and  
122 variable conditions required to remove chromogens and antibodies with diverse target affinities, we  
123 pursued a strategy based on fluorophore bleaching. To achieve an efficient means to increase the  
124 number of markers visualized on a single section, we sought a fluorophore inactivation method that  
125 could bleach a wide range of fluorophores in minutes without epitope loss or tissue destruction.  
126 While H<sub>2</sub>O<sub>2</sub> in alkaline solution has been reported to inactivate Cy3- and Cy5-conjugated antibodies  
127 in human FFPE samples (3), we observed significant tissue loss using this formulation over multiple  
128 cycles with fixed frozen samples (Fig. S1A). Adams *et al.* demonstrated the initial feasibility of  
129 borohydride derivatives to bleach fluorophores; however, their fluorophore quenching method  
130 required 2 hours per cycle and comprised only 3 distinct imaging channels (6), making direct  
131 application for highly multi-plex imaging impractical. To expand upon this method, we tested  
132 antibodies directly conjugated to fluorophores with excitation and emission spectra spanning from  
133 405 nm to 750 nm. We consistently found that the following fluorophores were inactivated within  
134 15 minutes of exposure to 1 mg/ml of Lithium Borohydride (LiBH<sub>4</sub>): Pacific Blue, Alexa Fluor  
135 (AF)488, FITC, AF532, Phycoerythrin (PE), AF555, eFluor(eF)570, AF647, eF660, and AF700.  
136 Brilliant Violet conjugates BV421 and BV510 bleached within 15 minutes of exposure to 1 mg/ml of  
137 LiBH<sub>4</sub> in the presence of light. In contrast, AF594, eF615, and the nuclear markers JOJO-1 and  
138 Hoechst required more than 120 minutes for significant loss of fluorescence signal (Table S1),  
139 permitting these probes to be used as fiducials for alignment of images emerging from iterative  
140 cycles.

141 To prevent tissue destruction over multiple cycles, we evaluated several different tissue  
142 adhesives and found that chrome gelatin alum securely adhered tissues to glass coverslips and  
143 slides, permitting more than 15 cycles to be performed with no appreciable loss to the tissue (Fig.  
144 S1B-C). We next reduced the antibody labeling time from 6-12 hours to 30-45 minutes by designing  
145 programs for a non-heating microwave that facilitates rapid antibody penetration into the section.  
146 Finally, although IBEX was designed to simply bleach the fluorophores, it was important to assess

147 whether LiBH<sub>4</sub> treatment physically removes antibodies from the tissue as this would have direct  
148 bearing on both the design and order of imaging panels. To examine this issue, mouse lymph node  
149 (LN) sections were immunolabeled with various primary antibodies, imaged, treated with LiBH<sub>4</sub>,  
150 and then incubated with a secondary antibody that would react with the primary antibody if it was  
151 still present on the tissue. For most of the antibody isotypes tested, we found almost identical  
152 staining patterns with the primary and secondary antibodies, indicating that LiBH<sub>4</sub> acts primarily by  
153 fluorophore bleaching without stripping the fluorescently conjugated antibodies themselves (Fig.  
154 S2).

155 The resulting method, IBEX, reduces the fluorophore inactivation and antibody labeling  
156 steps to less than 1 hour (Fig. 1A). We first tested IBEX in practical use by examining the image  
157 quality that could be obtained from a 3 cycle analysis of mouse LNs (Fig. 1B), a tissue with which  
158 we had extensive experience using multi-parameter, single cycle staining and image collection.  
159 This initial test used 6-8 markers per cycle and showed that all fluorophores, except for AF594 and  
160 JOJO-1, bleached rapidly in the presence of LiBH<sub>4</sub> treatment +/- light with no appreciable signal  
161 present after 10 minutes (Fig. 1C-D). These findings show that the IBEX pipeline performs as  
162 designed and allows for the rapid capture of high quality, multi-plexed imaging data over multiple  
163 cycles without tissue loss.

164

### 165 **A SimpleITK image registration pipeline**

166 The IBEX method yields a series of images that are collected separately. To properly  
167 process these data and correctly assign markers to individual cells, it is essential that all the images  
168 be aligned at high resolution. While various registration algorithms have been reported (21, 22), we  
169 sought a method that could align large datasets, was flexible in terms of the repeated markers  
170 (fiducials) utilized, and provided both a qualitative and quantitative metric for registration. For these  
171 reasons, we developed a workflow using SimpleITK, a simplified open source interface to the  
172 Insight Toolkit (ITK) that is compatible with multiple programming languages (23, 24). The  
173 SimpleITK workflow is an image intensity-based form of image alignment that relies on a repeated  
174 marker channel (fiducial) for registration. Due to the resistance of AF594, JOJO-1, and Hoechst to  
175 bleaching, we utilized markers in these fluorophores as fiducials. For a multi-cycle IBEX  
176 experiment, a 'fixed' image z-stack was selected and all other 'moving' images were resampled to  
177 this image. A cross correlation matrix was generated on the repeated marker channels to provide  
178 a quantitative means for assessing the quality of image registration (Fig. 2A). To test the fidelity of  
179 this method, a 3 cycle IBEX experiment was performed on mouse spleen sections labeled with the  
180 nuclear marker JOJO-1 and membrane label CD4 AF594. For these experiments, JOJO-1 was  
181 selected as the fiducial used for image registration; however, CD4 (also repeated in these  
182 experiments) showed pixel-to-pixel alignment as reflected in the images (Fig. 2B). Importantly, this  
183 platform can readily scale to handle large datasets (>260 GB) comprised of 20 cycles of imaging

184 (Fig. S1B-D). The SimpleITK registration workflow thus provides the needed cell-cell registration  
185 across x-y-z dimensions obtained via iterative imaging cycles using IBEX.

186

### 187 **IBEX is a versatile imaging method**

188 One obstacle to the wide adoption of existing multi-plex imaging methods is the need for  
189 specialized instruments or custom imaging chambers, a luxury not afforded to all laboratories. In  
190 contrast, IBEX is easily adaptable to diverse microscope systems and has no restrictions on the  
191 substrate (slide, coverslip, etc.) used for imaging (Fig. S3A). As a proof-of-concept, immunized  
192 mouse LN sections adhered to slides were visualized using an upright confocal microscope (4  
193 cycles, 6 markers per cycle) or an inverted fluorescence microscope (4 cycles, 4 markers per cycle)  
194 (Fig. S3B-C). These results demonstrate the compatibility of IBEX with a wide range of imaging  
195 systems; however, it is worth noting that the microscope system (confocal versus widefield) and  
196 configuration (light source, detectors, filter cubes) will dictate the image acquisition time, number  
197 of markers per cycle, and sample type that can be effectively imaged (5 vs. 30  $\mu\text{m}$  tissue thickness).

198 In the case of animal studies, it is also very useful to be able to integrate antibody staining  
199 with imaging of fluorescent marker proteins expressed by engineered cells transferred into animals  
200 or expressed *in situ*. We therefore next investigated whether the IBEX method could be used to  
201 image tissues from animals expressing fluorescent proteins (25). To this end, high dimensional  
202 imaging was performed on thymic tissues from transgenic animals expressing the following  
203 fluorescent proteins (FPs): cyan (CFP), green (GFP), yellow (YFP), and red (RFP) (26). No  
204 appreciable loss in signal was observed after 10 IBEX cycles for any of the FPs examined (Fig.  
205 S4A-B). The photostable FPs were used as fiducials for a 4 cycle IBEX experiment that  
206 incorporated the bleachable fluorophores AF647 and AF700, yielding a dataset that provided  
207 information on clonality (CFP, GFP, YFP, RFP) of T cells (CD4, CD8, Foxp3) and myeloid cells  
208 (CD11c, MHC II) in the thymus (Fig. S4C).

209 To determine how IBEX performs using sections from a variety of tissues, we performed  
210 3-5 cycle IBEX experiments on murine spleen, thymus, lung, small intestine, and liver tissue  
211 sections (Fig. 3A-B, Movies S1-S5, Table S2). It is important to note that the cycle and marker  
212 numbers described here are provided as a proof-of-concept and do not reflect technical limitations  
213 of the method. The antibody panels were designed to capture the major cellular populations and  
214 structures present in each organ and fluorophores were chosen to avoid native tissue  
215 autofluorescence. Organ-specific fiducials were selected based on expression throughout the  
216 tissue, e.g., EpCAM to mark the epithelium of the small intestine and laminin for the liver sinusoids.

217 Collectively, these data confirm the ability to use IBEX to obtain high quality, multi-plexed imaging  
218 datasets from a wide range of tissues.

219

### 220 **IBEX enables highly multi-plex, quantitative imaging**

221 The design principles of IBEX were chosen to enable a very high number of parameters to  
222 be attained in the analysis of an individual tissue sample. To determine how extensively the multi-  
223 plexing capacity of IBEX can be pushed, we first performed 10 cycle 41 parameter IBEX  
224 experiments on LNs obtained from naïve and sheep red blood cell (SRBC)-immunized mice (Fig.  
225 4A, Table S2, Movie S6). While epitope loss has been described for other iterative imaging  
226 techniques (5), we minimized this problem by increasing the number of markers per cycle and  
227 grouping markers present on the same cell in the same cycle. We observed qualitatively similar  
228 staining patterns when antibody panels were applied on individual sections alone (serial) versus  
229 on the same section iteratively (IBEX) (Fig. S5A and Movie S7). Therefore, quantitative differences  
230 observed between the two methods likely reflect biological differences resulting from variations in  
231 the magnitude of the immune response in individual LNs and not technical differences associated  
232 with epitope loss or steric hindrance (Fig. S5B and Movie S7).

233 To assess the quality of data generated by the IBEX method, we employed the open  
234 source, computational histology topography cytometry analysis toolbox (histoCAT) to quantify  
235 differences in LN organization resulting from immunization (27). Individual cells were segmented  
236 based on membrane and nuclear labels with Ilastik (28) and CellProfiler (29) and then analyzed  
237 using the histoCAT graphical user interface (GUI) (Fig. S6A). The unsupervised clustering  
238 algorithm Phenograph (30) identified 29 phenotype clusters shared across the naïve and  
239 immunized LNs that could be visualized using the data dimensionality reduction method t-SNE (31)  
240 in histoCAT (Fig. 4B). As a testament to the fidelity of cell-cell alignment, phenotype clusters were  
241 often characterized by the expression of several different markers present in distinct imaging cycles  
242 (Fig. S6B-C). The abundance of these cell phenotypes varied from naïve and immunized LNs (Fig.  
243 S6D) and could be manually annotated based on marker expression to reveal an increase in  
244 plasma cells (PCs) (cluster 10) and germinal center (GC) B cells (cluster 6) in immunized LNs (Fig.  
245 4C). As histoCAT relies on nuclear and membrane-based cell segmentation, it suffers from  
246 limitations frequently encountered with this approach: miscalling of phenotypes due to spatial  
247 overlap and improper segmentation of non-lymphocyte populations (32). The former is evident in  
248 the identification of the B cell specific transcription factor pax5 (33) on CD3<sup>+</sup>CD4<sup>+</sup>PD-1<sup>+</sup>Bcl6<sup>+</sup> T  
249 follicular helper (Tfh) cells (cluster 19), an artifact due to the close proximity of these cells within

250 the GC (Fig. S6C). Nevertheless, the results presented here demonstrate that IBEX-generated  
251 images are compatible with established methods for analyzing high dimensional imaging data.

252

### 253 **IBEX scales to capture ultra-high content data from large areas of human tissues**

254 In addition to capturing the cellular landscape of a diverse range of murine tissues, the  
255 IBEX method scales to enable high content imaging of human tissues. To this end, we present an  
256 application of the IBEX method to visualize tumor-immune interactions in a human pancreatic LN  
257 with metastatic lesions as shown by CD138+EpCAM+ cells in the LN capsule and sinuses (Fig. 5A,  
258 Table S3). Interestingly, cancer cells were segregated from lymphocytes by extensive collagen  
259 remodeling and recruitment of myeloid cells expressing the secreted protein acidic and rich in  
260 cysteine (SPARC), a matricellular glycoprotein involved in extracellular matrix (ECM) deposition  
261 and implicated in metastasis (34). To move to even deeper analysis of a much larger sample, we  
262 used a total of 66 antibodies for the analysis of a > 3mm<sup>2</sup> human mesenteric LN section. Using this  
263 approach, we were able to deeply phenotype a wide range of immune cells while observing no  
264 tissue degradation over 20 cycles (Fig. 5B, Movie S8, Table S3). Additionally, we observed  
265 subcellular resolution for PC-specific markers (membrane: CD138, nuclear: IRF4, cytoplasmic:  
266 IgA1, IgA2) present in distinct cycles with no epitope loss, as evidenced by our ability to label the  
267 immune marker CD45 with two different antibody clones present in cycles 9 and 19 (Movie S8).  
268 The utility of this method is further exemplified by our ability to characterize the complex stroma of  
269 the LN, shown to contain 9 distinct clusters in scRNA-Seq experiments from mouse LNs (35), using  
270 a wide range of antibodies visualized *in situ*:  $\alpha$ -SMA, CD21, CD23, CD34, CD35, CD49a, CXCL12,  
271 CXCL13, desmin, fibronectin, and vimentin. These data highlight the capacity of IBEX to identify a  
272 large number of distinct cell types in clinically relevant samples, while also placing these  
273 components in a spatial setting missed by methods employing dissociated single cells.

274

### 275 **Extensions of IBEX workflow**

276 Given the inherent versatility of the IBEX method, we sought to extend our workflow to  
277 develop two unique protocols, one that enables detection of low abundance epitopes and another  
278 that permits iterative imaging with oligonucleotide-conjugated antibodies corresponding to those  
279 used in scRNA-Seq experiments. Opal IHC, a method of signal amplification that employs  
280 incubation with an unconjugated primary, followed by a horseradish peroxidase (HRP)-conjugated  
281 secondary, and deposition of Opal fluorophore in the tissue, is an attractive method for detection  
282 of very low levels of specific proteins (36). We first tested this method by staining for endogenous  
283 levels of the chemokine CXCL9 in the liver sinusoids of mice (Fig. S7A), which showed a signal not  
284 readily detected with direct or indirect staining methods. Further, because Opal IHC is well  
285 described for the imaging of fixed (FFPE) human tissues (37, 38), we next evaluated whether this  
286 method could be expanded upon to achieve multi-parameter imaging of tissues from high



287 containment facilities. Due to the extreme fixation conditions required to inactivate select agents  
288 such as the Ebola virus (10% formalin for 8 days), the majority of stainable epitopes are lost in  
289 these tissues (39, 40). To overcome this significant technical limitation, we developed the Opal-  
290 plex method that is based on the IBEX pipeline. Opal-plex extends the usual fluorophore limitations  
291 of Opal by combining multi-plex Opal IHC with cycles of IBEX-based bleaching to eliminate signal  
292 from the following LiBH<sub>4</sub>-sensitive dyes (Opal 570, 650, and 690) while utilizing the LiBH<sub>4</sub>-resistant  
293 dye (Opal 540) as a fiducial (Fig. 6A, Fig. S7B). Using this approach, we achieved single cell  
294 resolution of 10 unique markers in heavily fixed mouse LNs (Fig. 6B, Movie S9).

295 We next evaluated whether oligonucleotide-conjugated antibodies, including those used  
296 for CITE-Seq, are compatible with our IBEX workflow. While immunolabeling with oligonucleotide-  
297 conjugated antibodies is well established (9), the use of a large number of commercially available  
298 TotalSeqA™ antibodies with publicly available oligo-tag sequences, the employment of non-  
299 proprietary buffers for hybridization and dehybridization, and the use of a wide spectrum of  
300 fluorophore-labeled complementary oligonucleotides provides a truly 'open source' system with  
301 many advantages. In particular, the imaging method described here applies the same antibodies  
302 used for scRNA-Seq, permitting direct comparison between imaging and CITE-Seq datasets while  
303 providing a much-needed spatial context for the cell populations identified. Using this approach,  
304 we were able to achieve high quality tissue staining with 5 unique fluorophores (Fig. S7C). This  
305 method can be directly integrated into our IBEX protocol, alongside fluorophore-conjugated  
306 antibodies when CITE-Seq antibodies to desired targets do not exist, as LiBH<sub>4</sub> bleaching leaves  
307 oligonucleotide binding intact (Fig. 6C-D). Importantly, the quality of staining achieved with  
308 oligonucleotide-conjugated antibodies, even after multiple cycles of LiBH<sub>4</sub> bleaching, is comparable  
309 to conventional IF as quantitative differences, e.g., higher expression of MHCII on DCs versus B  
310 cells, can still be observed (Fig. 6D, Fig. S7D, Movie S9). In summary, this protocol improves upon  
311 existing high dimensional DNA-based imaging techniques by offering full flexibility in antibody-  
312 fluorophore pairing, integrating commercially produced CITE-Seq reagents, reducing antibody  
313 labeling to one step, and extending the number of fluorophores per cycle.

314

## 315 Discussion

316 Multi-plex imaging of tissues is increasingly important for studies of tumor-immune  
317 interactions, for discovery efforts such as the Human Cell Atlas, for better understanding  
318 pathological events in infected or physically damaged tissues, and for placing data from isolated  
319 cells in the context of *in situ* tissue organization. IBEX is a broadly applicable technique that utilizes  
320 conventional microscopes and commercially available antibodies to obtain these essential high  
321 dimensional imaging data. IBEX improves upon existing iterative methods by addressing many of  
322 the limitations inherent to these techniques. First, we have significantly reduced the fluorophore  
323 inactivation step and antibody labeling time from >16 hours to <1 hour using a rapid chemical

324 bleaching agent and antibody labeling employing a commercial, non-heating microwave. Second,  
325 our selection of the bleaching agent LiBH<sub>4</sub> provides an efficient means to bleach over 15 unique  
326 fluorophores while preserving select fluorophores to serve as repeated markers for registration.  
327 Importantly, LiBH<sub>4</sub> treatment does not cause tissue or epitope loss as evidenced by our ability to  
328 obtain highly multi-plexed data over several cycles in a wide range of tissues with a very large  
329 number of antibodies. Third, and integral to the preservation of tissue integrity through multiple fluid  
330 handling cycles, was the use of the tissue adhesive chrome gelatin alum. Importantly, this adhesive  
331 adheres delicate tissues to the slide or coverslip surface while maintaining key anatomical features.  
332 Finally, the SimpleITK workflow described here represents a significant advancement for the  
333 registration of images obtained via cyclic IF methods. In addition to offering flexibility in terms of  
334 the repeated markers (membrane, nuclear, structural) used, it provides alignment of markers  
335 present on the same cell but not utilized as the fiducial. This is a critical standard for all high  
336 dimensional imaging methods because multiple markers are often required to phenotype a  
337 particular cell type and staining for the relevant epitopes may occur in different imaging cycles.

338 In addition to developing an efficient method for highly multi-plexed imaging, the IBEX  
339 workflow, unlike commercial all-in-one systems (9-11), offers flexibility in terms of cellular markers,  
340 antibody-fluorophore combinations, and microscope configurations employed. Because the  
341 chemistry of bleaching depends on the fluorophore and not the antibody to which it is conjugated,  
342 once the bleaching conditions are defined, staining panels can be designed using specific  
343 combinations of fluorophores without regard for the target epitopes of the antibodies employed,  
344 providing the user with extreme versatility in experimental design. To this end, we report the  
345 validation of more than 200 commercially available antibodies conjugated to fluorophores with  
346 excitation and emission spectra ranging from 405 nm to 750 nm. Furthermore, we demonstrate that  
347 commercially available oligonucleotide-conjugated antibodies can be seamlessly integrated into  
348 our IBEX workflow, representing the first application of TotalSeqA™ antibodies for *in situ* IHC.  
349 Given that the barcode sequences for TotalSeqA™ antibodies are disclosed, and a wide range of  
350 fluorophore-conjugated oligos is readily available, fluorophore and antibody pairing can be fully  
351 customized to match microscope configuration, epitope abundance, and unique tissue  
352 characteristics. Taken together, the oligonucleotide-staining method described here provides a  
353 completely 'open' method to achieve highly multi-plexed IF imaging using the same antibodies  
354 employed for flow cytometry and/or CITE-Seq, enabling effective cross-referencing of datasets  
355 derived from these complementary technologies.

356 As a proof-of-concept, we have used the IBEX workflow to examine such issues as the  
357 visualization of difficult to extract myeloid populations in various tissues, changes in immune cell  
358 composition following immune perturbation, and detection of low abundance epitopes. For the first  
359 application, we were able to visualize tissue-resident macrophages that are difficult to characterize  
360 using other methods such as flow cytometry because of their limited recovery upon enzymatic

361 tissue digestion (12). Using the panels of antibodies outlined here, we were able to deeply  
362 phenotype medullary (CD169<sup>+</sup>F4/80<sup>+</sup>CD11b<sup>+</sup>Lyve-1<sup>+/−</sup>) and subcapsular sinus (CD169<sup>+</sup>F4/80<sup>+</sup>  
363 CD11b<sup>+</sup>) macrophages in the LNs (41) as well as alveolar (SiglecF<sup>+</sup>CD11b<sup>+</sup>CD11c<sup>+</sup>) and interstitial  
364 (CD11b<sup>+</sup>CD11c<sup>+</sup>MHCII<sup>+</sup>) macrophages of the lung (42). Additionally, we show that the IBEX  
365 method can be scaled to capture ultra-high content imaging in human tissues. The ability to survey  
366 large areas of human tissue is critically important as all possible information needs to be extracted  
367 to provide maximally useful clinical and research data.

368 Beyond simple visualization of diverse cell types, we have shown compatibility between  
369 IBEX-generated data and downstream single-cell, spatially-resolved analysis using the open  
370 source method histoCAT. From the 10 cycle IBEX experiments described above, the histoCAT  
371 workflow identified 29 phenotype clusters characterized by the expression of several different  
372 markers present in distinct imaging cycles. Importantly, this approach identified well described  
373 changes following immunization such as an increase in Tfh cells and GC B cells (43). Finally,  
374 incorporation of multi-plex Opal IHC into our IBEX workflow facilitated the detection of low  
375 abundance epitopes present in conventionally fixed tissues while aiding in the detection of epitopes  
376 lost under extreme fixation conditions. The latter represents a significant achievement because few  
377 studies have visualized the immunopathology induced by select agents and, to date, the largest  
378 number of parameters examined in a single section has been limited to 3 (44). The ability to use  
379 IBEX in its native format and with the Opal-plex variation is especially valuable in the context of the  
380 current COVID-19 pandemic. Preliminary data show that these methods work well with highly fixed  
381 post-mortem samples from such patients.

382 In summary, IBEX constitutes a versatile technique for obtaining high content imaging data  
383 using conventional microscopes and commercially available antibodies. In addition to providing a  
384 valuable resource for studying tissue-based immunity in animal models of disease, ongoing studies  
385 have shown the value of the IBEX method to provide a spatially-defined assessment of complex  
386 cell phenotypes from diverse organs including lung, kidney, heart, and lymphoid tissues from  
387 surgical specimens as well as post-mortem samples from human COVID-19 patients. We believe  
388 that the open nature of the reagents that can be utilized, and the variety of instruments suitable for  
389 implementation of IBEX, make it an attractive method for many laboratories seeking to obtain a  
390 deeper understanding of cell composition and spatial organization in tissues of interest.

391

## 392 **Materials and Methods**

393 Detailed descriptions of animals, immunization and tissue preparations, reagents, imaging  
394 protocols with Opal fluorophores and oligonucleotide-conjugated antibodies, microscopy  
395 configurations, and image acquisition and analysis details are reported in the SI Materials and  
396 Methods.

397

## 398 **Mouse and human tissues**

399 Murine organs and human LNs (1 cm<sup>3</sup> or smaller in size) were fixed with BD  
400 CytoFix/CytoPerm (BD Biosciences) diluted in PBS (1:4) for 2 days. Following fixation, all tissues  
401 were washed briefly (5 minutes per wash) in PBS and incubated in 30% sucrose for 2 days before  
402 embedding in OCT compound (Tissue-Tek). All mice were maintained in specific pathogen-free  
403 conditions at an Association for Assessment and Accreditation of Laboratory Animal Care-  
404 accredited animal facility at the National Institute of Allergy and Infectious Diseases (NIAID). All  
405 procedures were approved by the NIAID Animal Care and Use Committee (NIH). De-identified  
406 human LN samples were obtained from patients undergoing elective risk-reducing gastrectomies  
407 or colon resections for colon adenocarcinoma at the National Cancer Institute (NCI) based on an  
408 Institutional Review Board (IRB) approved tissue collection protocol (#13C-0076).

## 409 **IBEX using inverted confocal microscope**

410 20-30 µm sections were cut on a CM1950 cryostat (Leica) and adhered to 2 well  
411 Chambered Coverglasses (Lab-tek) coated with 15 µl of chrome alum gelatin (Newcomer Supply)  
412 per well. Frozen sections were permeabilized, blocked, and stained in PBS containing 0.3% Triton  
413 X-100 (Sigma-Aldrich), 1% bovine serum albumin (Sigma-Aldrich), and 1% mouse or human Fc  
414 block (BD Biosciences). For conventional IF, sections were first blocked 1-2 hours at room  
415 temperature and then stained for 12 hours at 4 °C in a humidity chamber. For microwave-assisted  
416 IF, we utilized the PELCO BioWave Pro 36500-230 microwave equipped with a PELCO  
417 SteadyTemp Pro 50062 Thermoelectric Recirculating Chiller (Ted Pella). A 2-1-2-1-2-1-2-1-2  
418 program was used for immunolabeling where '2' denotes 2 minutes at 100 watts and '1' denotes 1  
419 minute at 0 watts. The above program was executed once for blocking and secondary antibody  
420 labeling and twice for primary antibody labeling. A complete list of antibodies and tissue-specific  
421 panels can be found in Tables S1-S5. Cell nuclei were visualized with JOJO-1 (Thermo Fisher  
422 Scientific) or Hoechst (Biotium) and sections were mounted using Fluoromount G (Southern  
423 Biotech). Mounting media was thoroughly removed by washing with PBS after image acquisition  
424 and before chemical bleaching of fluorophores. Samples were treated with 1 mg/mL of LiBH<sub>4</sub>  
425 (STREM Chemicals) prepared in diH<sub>2</sub>O for 15 minutes to bleach all fluorophores except JOJO-1,  
426 Hoechst, eF615, and Alexa Fluor 594. To bleach antibodies conjugated to Brilliant Violet 421  
427 (BV421) and Brilliant Violet 510 (BV510) dyes, tissue sections were illuminated using the metal  
428 halide lamp with the DAPI filter of the Leica TCS SP8 X inverted confocal microscope. The  
429 efficiency of fluorophore bleaching was assessed in real time by viewing the LiBH<sub>4</sub>-incubated  
430 samples on the microscope. Following efficient bleaching, the LiBH<sub>4</sub> solution was removed and  
431 samples were washed in 3 exchanges of PBS, restained with the next panel, and mounted with  
432 Fluoromount G. Fluorophore inactivation with H<sub>2</sub>O<sub>2</sub> was conducted as described previously (5) with

433 tissue sections being treated for 1 hour at room temperature with 4.5% H<sub>2</sub>O<sub>2</sub> (Sigma) prepared in  
434 an alkaline solution. Tissue sections were imaged as described in the SI Materials and Methods.

435

### 436 **Image alignment and registration**

437 The alignment of all IBEX panels to a common coordinate system was performed  
438 using SimpleITK (23, 24). To facilitate registration, we utilized a common channel present in all  
439 panels. As the images may differ by a significant translational motion, we use a Fourier domain-  
440 based initialization approach (45) that accommodates for this motion. In addition, we  
441 utilized SimpleITK's multi-scale registration framework with four levels, reducing the resolution by  
442 a factor of two per level. Directly using the original voxel sizes, on the order of 10<sup>-3</sup>  
443 mm, in the gradient descent optimizer computations leads to numerical instability. We therefore  
444 normalized the voxel dimensions during optimization, while preserving anisotropy. The final,  
445 optimal transformations are then used to resample all channels from each panel to the common  
446 coordinate system. The software repository for SITK\_IBEX can be found on [github.com/niaid/sitk-  
447 ibex](https://github.com/niaid/sitk-ibex).

448

### 449 **Extensions of IBEX protocol**

450 Integrating IBEX with Opal dyes or oligonucleotide-conjugated antibodies was performed  
451 as detailed in the SI Materials and Methods. For multi-plex Opal IHC the following steps—primary  
452 antibody incubation, incubation with HRP-conjugated secondary, labeling with Opal dye, and  
453 antibody stripping—were repeated to achieve 6-plex imaging using the Opal 520, 540, 570, 620,  
454 650, and 690 fluorophores. After representative images were captured, coverslips were removed  
455 and tissue sections were treated with 1 mg/mL of LiBH<sub>4</sub> prepared in diH<sub>2</sub>O for 30 minutes to bleach  
456 the Opal 570, 650, and 690 dyes. Cycles of multi-plex Opal IHC and IBEX were repeated to achieve  
457 the desired number of markers. For integration of oligonucleotide-conjugated antibodies into the  
458 IBEX workflow, TotalSeq-A™ antibodies were co-incubated with fluorophore-conjugated antibodies  
459 which were imaged first before LiBH<sub>4</sub> bleaching. Oligonucleotides are preserved and  
460 complementary fluorophore-conjugated oligonucleotides are used to reveal immunostaining, then  
461 either dehybridized or bleached again *in situ* across multiple cycles.

### 462 **Acknowledgments**

463 This research was supported by the Intramural Research Program of the NIH, NIAID and  
464 NCI. The authors declare no financial conflicts of interest. This research was also partially  
465 supported by a Research Collaboration Agreement (RCA) between NIAID and BioLegend, Inc.  
466 (RCA# 2020-0333). CJC is supported as a UK-US Fulbright Scholar. We would like to thank Dr.  
467 Jagan Muppidi for assistance with SRBC immunization and tissue harvest. Figures were created  
468 with Biorender.com.

469

## 470 References

- 471 1. W. Schubert, Topological proteomics, toponomics, MELK-technology. *Adv Biochem Eng*  
472 *Biotechnol* **83**:189-209 (2003).
- 473 2. W. Schubert *et al.*, Analyzing proteome topology and function by automated  
474 multidimensional fluorescence microscopy. *Nat. Biotechnol.* **24**, 1270-1278 (2006).
- 475 3. M.J. Gerdes *et al.*, Highly multiplexed single-cell analysis of formalin-fixed, paraffin-  
476 embedded cancer tissue. *Proc. Natl. Acad. Sci. U.S.A.* **110**, 11982-11987 (2013).
- 477 4. J.R. Lin, M. Fallahi-Sichani, P.K. Sorger, Highly multiplexed imaging of single cells using  
478 a high-throughput cyclic immunofluorescence method. *Nat. Commun.* **6**, 8390 (2015).
- 479 5. J.R. Lin *et al.*, Highly multiplexed immunofluorescence imaging of human tissues and  
480 tumors using t-CyCIF and conventional optical microscopes. *Elife* **7**, (2018).
- 481 6. D.L. Adams, R.K. Alpaugh, S. Tsai, C.M. Tang, S. Stefansson, Multi-phenotypic  
482 subtyping of circulating tumor cells using sequential fluorescent quenching and  
483 restaining. *Sci. Rep.* **6**, 33488 (2016).
- 484 7. T. Tsujikawa *et al.*, Quantitative multiplex immunohistochemistry reveals myeloid-  
485 inflamed tumor-immune complexity associated with poor prognosis. *Cell Rep.* **19**, 203-  
486 217 (2017).
- 487 8. G. Gut, M.D. Herrmann, L. Pelkmans, Multiplexed protein maps link subcellular  
488 organization to cellular states. *Science* **361**, 6401 (2018).
- 489 9. Y. Goltsev *et al.*, Deep profiling of mouse splenic architecture with CODEX multiplexed  
490 imaging. *Cell* **174**, 968-981 e915 (2018).
- 491 10. M. Angelo *et al.*, Multiplexed ion beam imaging of human breast tumors. *Nat. Med.* **20**,  
492 436-442 (2014).
- 493 11. C. Giesen *et al.*, Highly multiplexed imaging of tumor tissues with subcellular resolution  
494 by mass cytometry. *Nat. Methods* **11**, 417-422 (2014).
- 495 12. M.Y. Gerner, W. Kastenmuller, I. Ifrim, J. Kabat, R.N. Germain, Histo-cytometry: a method  
496 for highly multiplex quantitative tissue imaging analysis applied to dendritic cell subset  
497 microanatomy in lymph nodes. *Immunity* **37**, 364-376 (2012).
- 498 13. W. Kastenmuller, P. Torabi-Parizi, N. Subramanian, T. Lammermann, R.N. Germain, A  
499 spatially-organized multicellular innate immune response in lymph nodes limits systemic  
500 pathogen spread. *Cell* **150**, 1235-1248 (2012).
- 501 14. K. Mao *et al.*, Innate and adaptive lymphocytes sequentially shape the gut microbiota and  
502 lipid metabolism. *Nature* **554**, 255-259 (2018).
- 503 15. A.P. Baptista *et al.*, The chemoattractant receptor Ebi2 drives intranodal naive CD4(+) T  
504 cell peripheralization to promote effective adaptive immunity. *Immunity* **50**, 1188-1201  
505 e1186 (2019).
- 506 16. S. Uderhardt, A.J. Martins, J.S. Tsang, T. Lammermann, R.N. Germain, Resident  
507 macrophages cloak tissue microlesions to prevent neutrophil-driven inflammatory damage.  
508 *Cell* **177**, 541-555 e517 (2019).
- 509 17. C. Petrovas *et al.*, Follicular CD8 T cells accumulate in HIV infection and can kill infected  
510 cells in vitro via bispecific antibodies. *Sci. Transl. Med.* **9**, 373 (2017).
- 511 18. I. Sayin *et al.*, Spatial distribution and function of T follicular regulatory cells in human lymph  
512 nodes. *J. Exp. Med.* **215**, 1531-1542 (2018).
- 513 19. W. Li, R.N. Germain, M.Y. Gerner, Multiplex, quantitative cellular analysis in large tissue  
514 volumes with clearing-enhanced 3D microscopy (Ce3D). *Proc. Natl. Acad. Sci. U.S.A.* **114**,  
515 E7321-E7330 (2017).
- 516 20. M. Stoeckius *et al.*, Simultaneous epitope and transcriptome measurement in single cells.  
517 *Nat. Methods* **14**, 865-868 (2017).
- 518 21. P. Thevenaz, U.E. Ruttimann, M. Unser, A pyramid approach to subpixel registration based  
519 on intensity. *IEEE Trans. Image Process.* **7**, 27-41 (1998).
- 520 22. M. Guizar-Sicairos, S.T. Thurman, J.R. Fienup, Efficient subpixel image registration  
521 algorithms. *Opt. Lett.* **33**, 156-158 (2008).

- 522 23. B.C. Lowekamp, D.T. Chen, L. Ibanez, D. Blezek, The design of SimpleITK. *Front.*  
523 *Neuroinform.* **7**, 45 (2013).
- 524 24. Z. Yaniv, B.C. Lowekamp, H.J Johnson, R. Beare, SimpleITK image-analysis notebooks:  
525 a collaborative environment for education and reproducible research. *J. Digit. Imaging* **31**,  
526 290-303 (2018).
- 527 25. S. Li S *et al.*, Overview of the reporter genes and reporter mouse models. *Animal Model*  
528 *Exp. Med.* **1**, 29-35 (2018).
- 529 26. H.J. Snippert *et al.*, Intestinal crypt homeostasis results from neutral competition between  
530 symmetrically dividing Lgr5 stem cells. *Cell* **143**, 134-144 (2010).
- 531 27. D. Schapiro *et al.*, histoCAT: analysis of cell phenotypes and interactions in multiplex image  
532 cytometry data. *Nat. Methods* **14**, 873-876 (2017).
- 533 28. S. Berg *et al.*, ilastik: interactive machine learning for (bio)image analysis. *Nat. Methods*  
534 **16**, 1226-1232 (2019).
- 535 29. A.E. Carpenter *et al.*, CellProfiler: image analysis software for identifying and quantifying  
536 cell phenotypes. *Genome Biol.* **7**, R100 (2006).
- 537 30. J.H. Levine *et al.*, Data-driven phenotypic dissection of AML reveals progenitor-like cells  
538 that correlate with prognosis. *Cell* **162**, 184-197 (2015).
- 539 31. A.D. Amir *et al.*, viSNE enables visualization of high dimensional single-cell data and  
540 reveals phenotypic heterogeneity of leukemia. *Nat. Biotechnol.* **31**, 545-552 (2013).
- 541 32. B. Bodenmiller, Multiplexed epitope-based tissue imaging for discovery and healthcare  
542 applications. *Cell Syst.* **2**, 225-238 (2016).
- 543 33. C. Cobaleda, A. Schebesta, A. Delogu, M. Busslinger, Pax5: the guardian of B cell identity  
544 and function. *Nat. Immunol.* **8**, 463-470 (2007).
- 545 34. S. Sangaletti *et al.*, Macrophage-derived SPARC bridges tumor cell-extracellular matrix  
546 interactions toward metastasis. *Cancer Res* **68**, 9050-9059 (2008).
- 547 35. L.B. Rodda *et al.*, Single-Cell RNA Sequencing of lymph node stromal cells reveals niche-  
548 associated heterogeneity. *Immunity* **48**, 1014-1028 e1016 (2018).
- 549 36. E.C. Stack, C. Wang, K.A. Roman, C.C. Hoyt, Multiplexed immunohistochemistry, imaging,  
550 and quantitation: a review, with an assessment of Tyramide signal amplification,  
551 multispectral imaging and multiplex analysis. *Methods* **70**, 46-58 (2014).
- 552 37. E.R. Parra *et al.*, Validation of multiplex immunofluorescence panels using multispectral  
553 microscopy for immune-profiling of formalin-fixed and paraffin-embedded human tumor  
554 tissues. *Sci Rep-Uk* **7** (2017).
- 555 38. M. Gorris *et al.*, Eight-color multiplex immunohistochemistry for simultaneous detection of  
556 multiple immune checkpoint molecules within the tumor microenvironment. *Lab Invest.* **98**,  
557 806-806 (2018).
- 558 39. R.W. Dapson, Macromolecular changes caused by formalin fixation and antigen retrieval.  
559 *Biotech. Histochem.* **82**, 133-140 (2007).
- 560 40. J.D. Webster, M.A. Miller, D. DuSold, J. Ramos-Vara, Effects of prolonged formalin fixation  
561 on diagnostic immunohistochemistry in domestic animals. *J. Histochem. Cytochem.* **57**,  
562 753-761 (2009).
- 563 41. E.E. Gray, J.G. Cyster, Lymph node macrophages. *J. Innate Immun.* **4**, 424-436 (2012).
- 564 42. A.V. Misharin, L. Morales-Nebreda, G.M. Mutlu, G.R. Budinger, H. Perlman, Flow  
565 cytometric analysis of macrophages and dendritic cell subsets in the mouse lung. *Am. J.*  
566 *Respir. Cell Mol. Biol.* **49**, 503-510 (2013).
- 567 43. G.D. Victora, M.C. Nussenzweig, Germinal centers. *Annu. Rev. Immunol.* **30**, 429-457 (  
568 2012).
- 569 44. A.R. Greenberg *et al.*, Quantification of viral and host biomarkers in the liver of rhesus  
570 macaques: a longitudinal study of Zaire ebolavirus strain kikwit (EBOV/Kik). *Am. J. Pathol.*  
571 (2020).
- 572 45. D. Padfield, Masked object registration in the Fourier domain. *IEEE Trans. Image Process*  
573 **21**, 2706-2718 (2012).
- 574  
575  
576

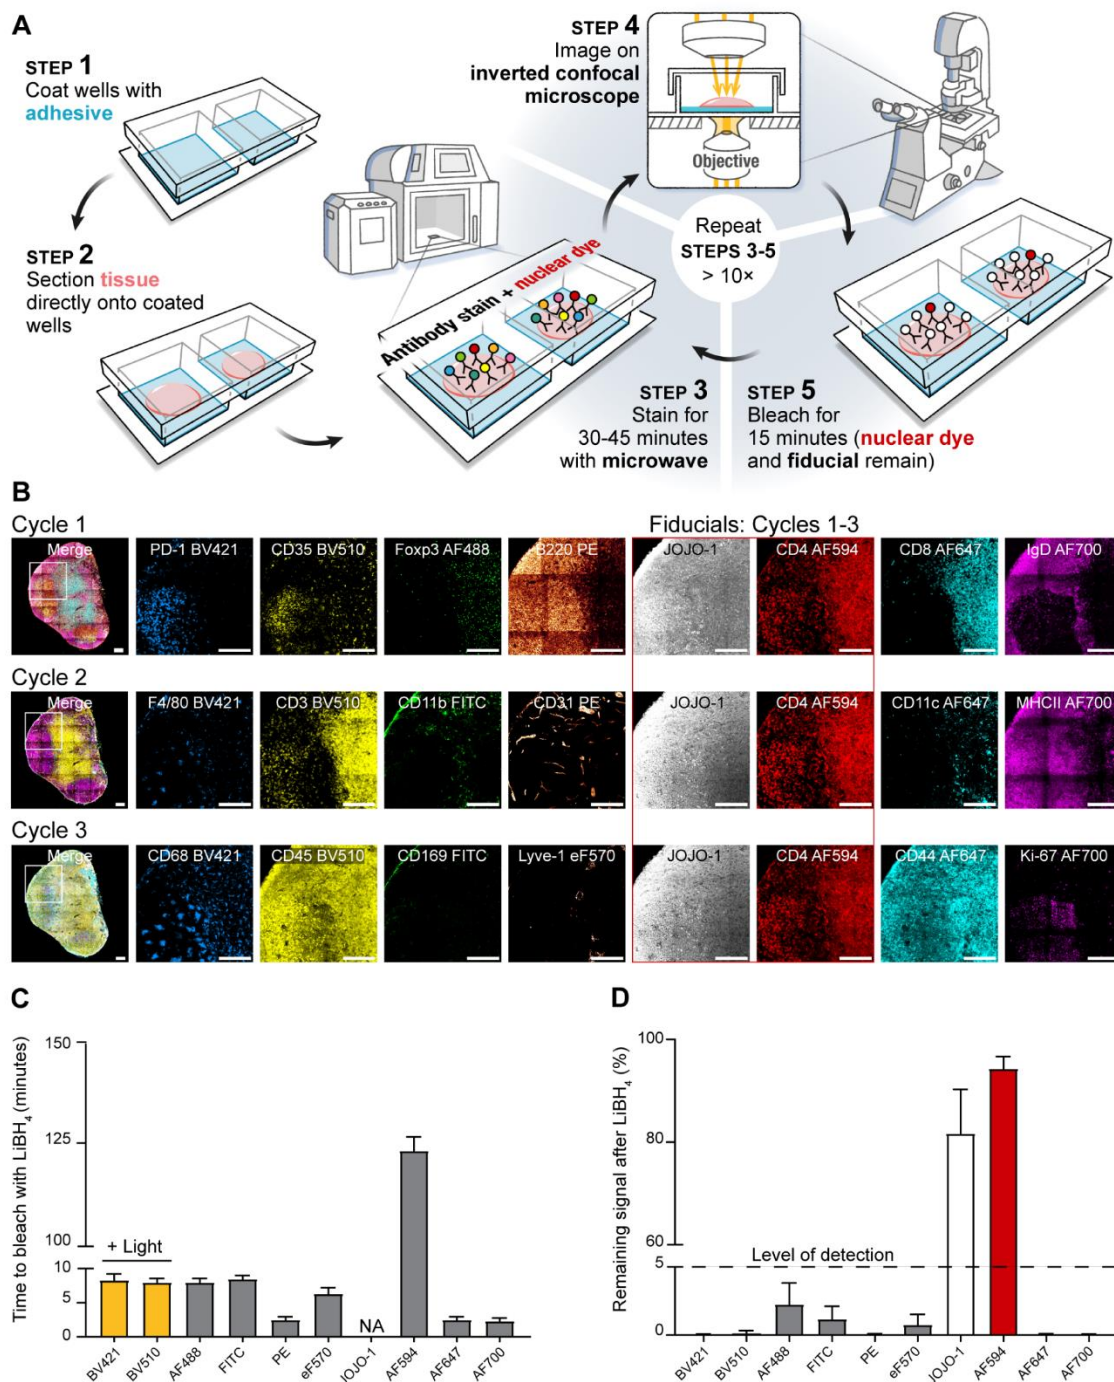

577  
578

**Figure 1. IBEX: A high dimensional, iterative imaging technique.**

579 (A) Schematic depicting IBEX protocol using an inverted confocal microscope. (B) Mice were  
580 immunized s.c. with 25  $\mu$ l of SRBCs on day 0 and 7. On day 14, pLN tissue sections were labeled  
581 with 3 separate imaging panels. JOJO-1 and CD4 AF594 were present throughout cycles 1-3 and  
582 served as fiducials. Left-most panel is a composite of all channels except for JOJO-1. Scale bar  
583 represents 150  $\mu$ m. Light refers to bleaching with LiBH<sub>4</sub> while sample was illuminated with a metal  
584 halide lamp and DAPI filter (C) Time required to bleach respective fluorophores using LiBH<sub>4</sub>. NA  
585 indicates no appreciable loss of signal over multiple hours of LiBH<sub>4</sub> exposure. (D) Percentage of



586 fluorophore signal remaining after 15 minutes of LiBH<sub>4</sub> treatment. Data are pooled from 2 similar  
587 experiments.

588

589

590

591

592

593

594

595

596

597

598

599

600

601

602

603

604

605

606

607

608

609

610

611

612

613

614

615

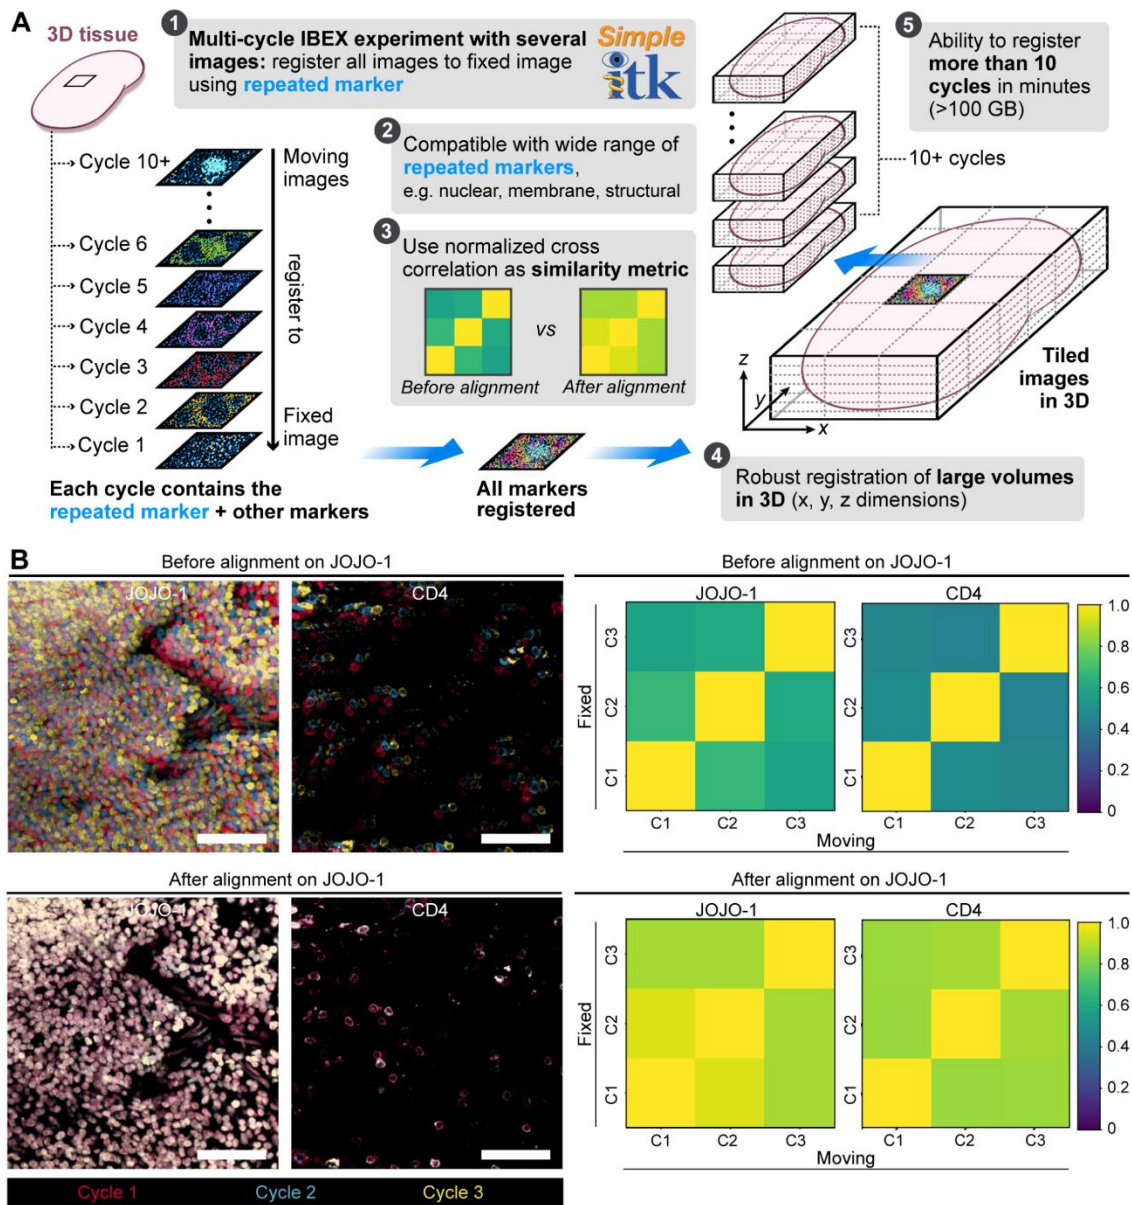

616

617 **Figure 2. Image alignment with SimpleITK image registration pipeline.**

618 (A) Workflow for SimpleITK image registration pipeline. (B) Confocal images showing JOJO-1 and  
 619 CD4 from 3 consecutive IBEX cycles before and after alignment using the nuclear marker JOJO-1  
 620 as a fiducial across all 3 cycles. CD4 was also repeated and shows cell-cell registration after JOJO-  
 621 1 alignment. Cycle (C), scale bar is 50  $\mu$ m. Cross correlation similarity matrices before and  
 622 after alignment with JOJO-1 for JOJO-1 and CD4 channels. All experiments are representative of at  
 623 least 2 similar experiments.

624

625

626

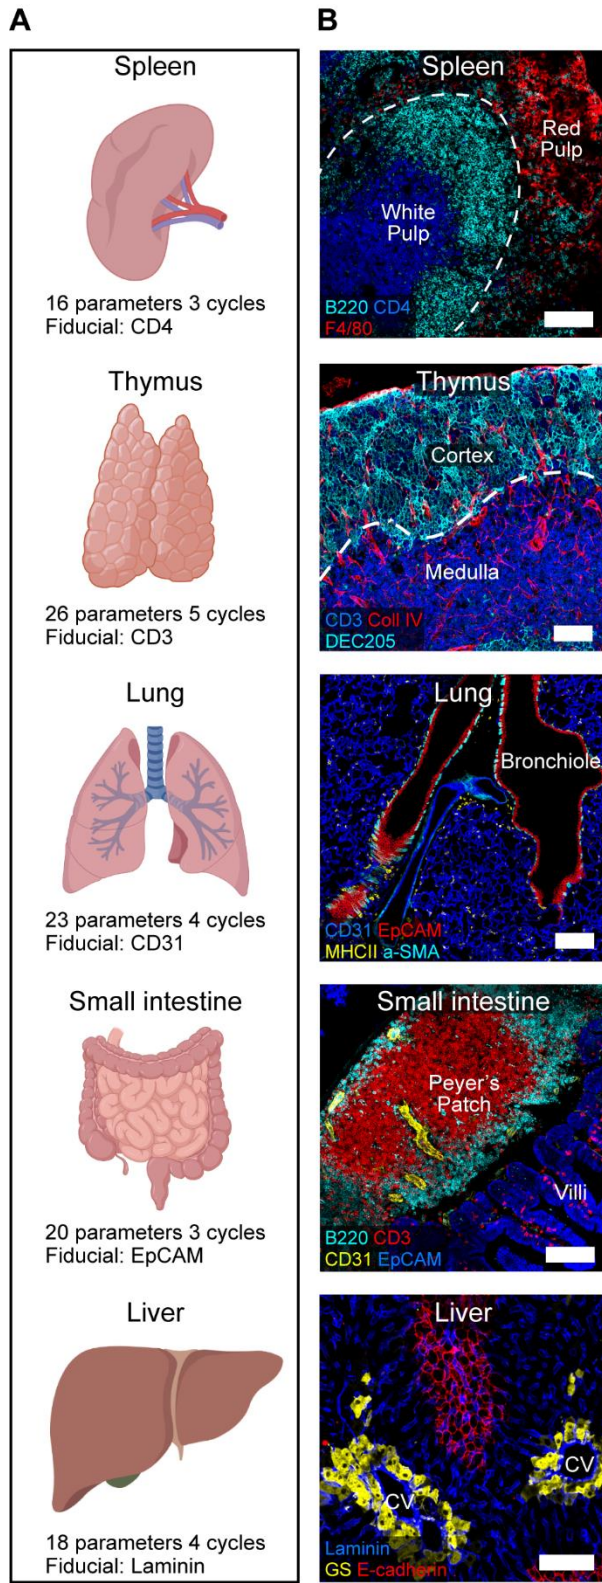

627

628 **Figure 3. IBEX in multiple murine organs.**

629 (A) IBEX experimental parameters. (B) Confocal images from IBEX experiments in various mouse  
630 organs. Liver: central vein (CV) and glutamine synthetase (GS). Scale bar is 100  $\mu$ m. See Movies  
631 S1-S5 for additional details.

632  
633  
634  
635  
636  
637  
638  
639  
640  
641  
642  
643  
644  
645  
646  
647  
648  
649  
650  
651  
652  
653  
654  
655  
656  
657  
658  
659  
660  
661  
662  
663  
664  
665  
666  
667  
668  
669  
670  
671  
672  
673  
674  
675  
676  
677  
678  
679  
680  
681  
682

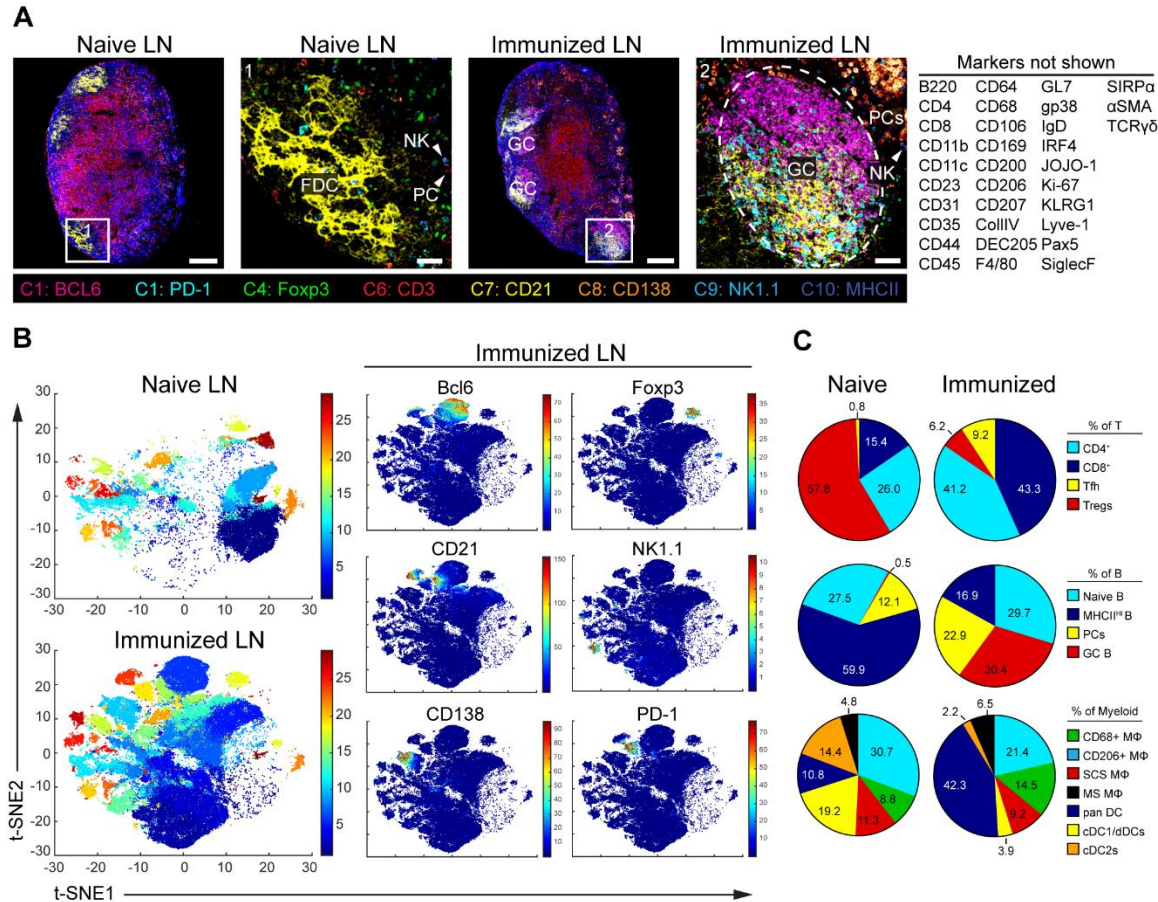

683  
684 **Figure 4. Visualization and quantification of LN populations using IBEX and histoCAT**  
685 **following immune perturbation.**  
686

687 (A) Confocal images of pLNs from naïve and SRBC-immunized mice from 10 cycle (C) 41  
688 parameter IBEX experiments, GC (germinal center), NK (natural killer), FDC (follicular dendritic  
689 cell), PC (plasma cells). Scale bars from left to right: 100 μm, 25 μm, 100 μm, and 50 μm. (B)  
690 t-SNE plots from naïve and immunized LNs identified by Phenograph clustering using segmented  
691 cells in histoCAT (naïve n = 32,091; immune n = 80,355). Color reflects the cluster ID number (1-  
692 29). Single plots show separation of representative markers into discrete clusters with color map  
693 showing relative expression levels based on Z-score normalized marker intensity values. (C)  
694 Phenograph clusters identified by histoCAT were phenotyped based on marker expression and  
695 expressed as a proportion of lineage. Tfh (T follicular helper), MΦ (macrophage), SCS (subcapsular  
696 sinus), MSM (Medullary sinus), DC (dendritic cell), dDC (dermal DC). Data are from one experiment  
697 and representative of 2 similar experiments. See Fig. S6 and Movie S6.

698

699

700

701

702

703

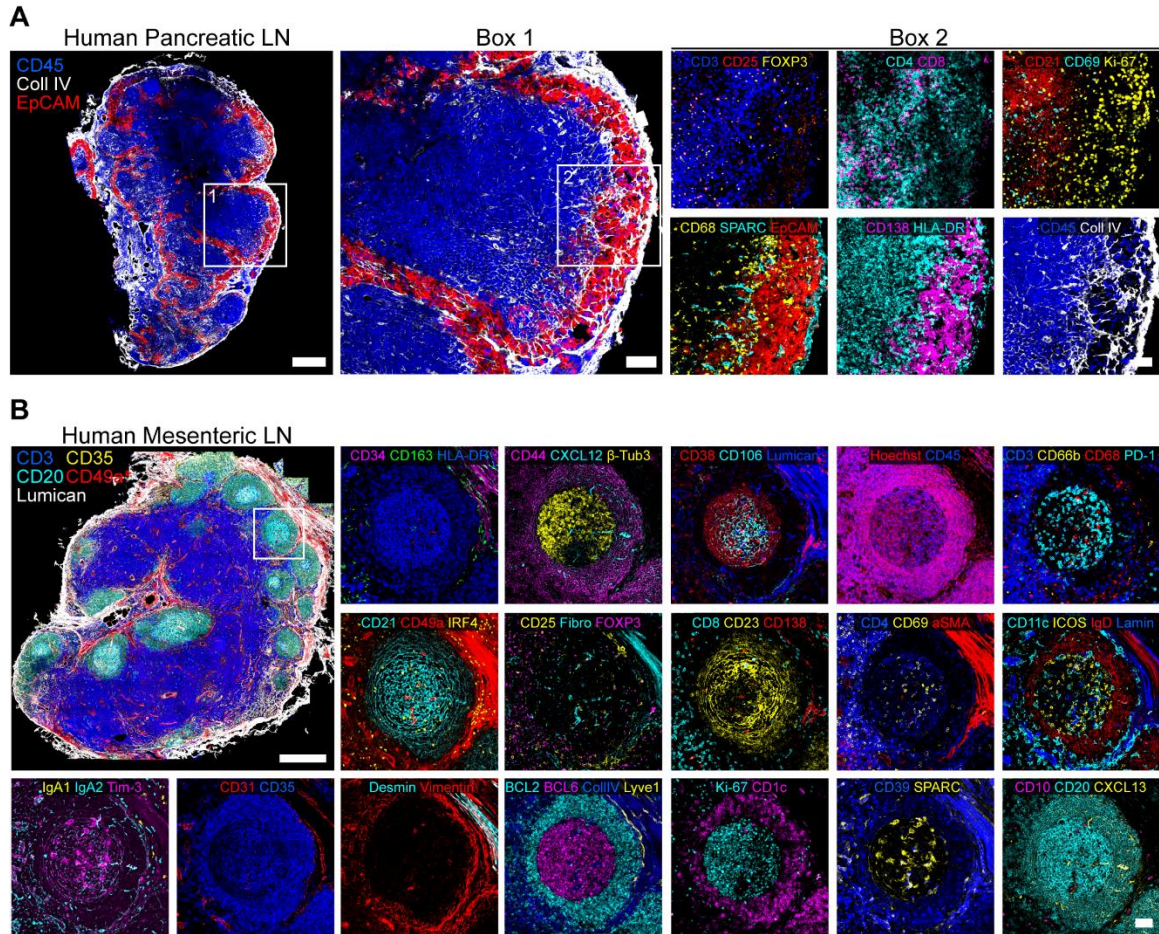

704  
705

**Figure 5. IBEX scales to capture ultra-high content imaging in human tissues.**

706 (A) Confocal images from a pancreatic LN with metastatic lesions from a patient with colorectal  
707 cancer (4 cycle 17 parameter IBEX experiment). Scale bar is 500  $\mu$ m (left), 100  $\mu$ m (Box 1), or 50  
708  $\mu$ m (Box 2). (B) Representative confocal images from human mesenteric LN obtained by IBEX  
709 method (20 cycle 66 parameters). Scale bars (500 or 50  $\mu$ m). Fibronectin (Fibro), Laminin (Laminin).  
710 See Movie S8 for additional details.

711

712

713

714

715

716

717

718

719

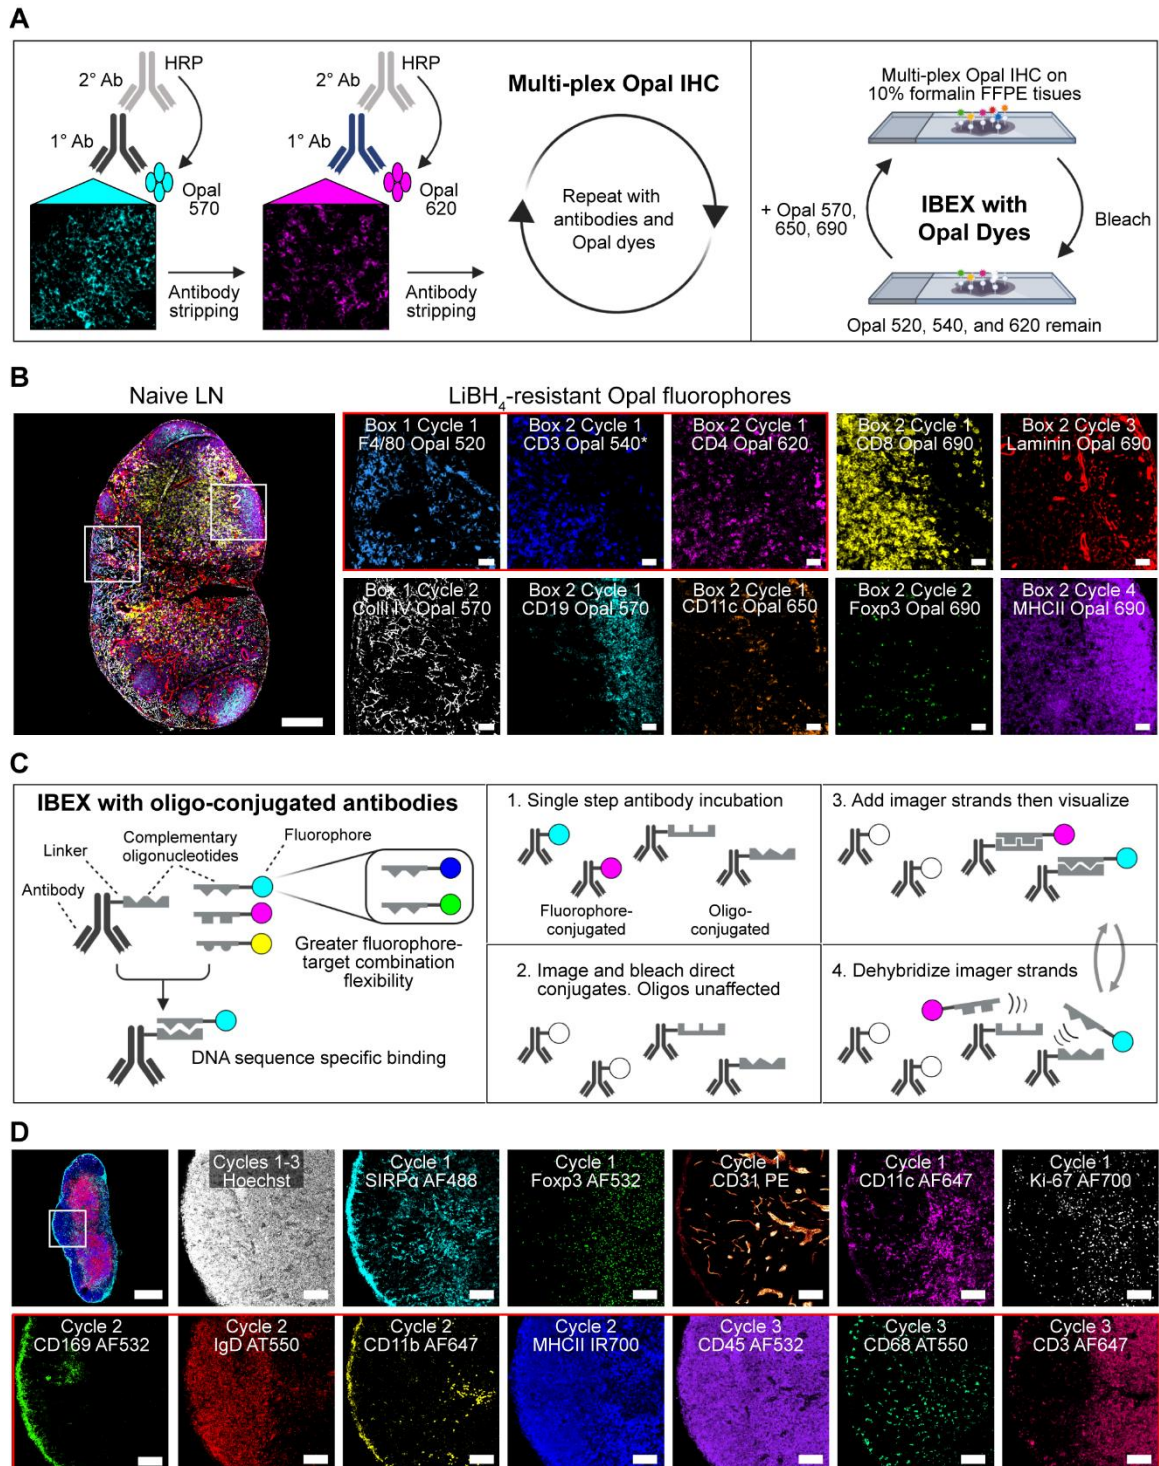

720  
721  
722

**Figure 6. Incorporation of Opal fluorophores and oligo-conjugated antibodies into IBEX workflow.**

723 (A) Opal-plex imaging method consisting of several rounds of labeling with marker-specific primary  
724 antibodies, an HRP-conjugated secondary antibody, Opal dyes, and antibody stripping for each  
725 marker-Opal fluorophore pair followed by cycles of IBEX (imaging, removal of coverslip, and  
726 bleaching). (B) Representative images from a 10 parameter 4 cycle Opal-plex experiment

727 performed on 5  $\mu\text{m}$  FFPE tissue sections from heavily fixed mouse pLNs. CD3 Opal 540 was  
728 present throughout cycles 1-4 and served as a fiducial (\*). Scale bars (200  $\mu\text{m}$ , left-most panel or  
729 50  $\mu\text{m}$ ). (C) Schematic depicting principle behind tissue imaging with oligo-conjugated antibodies  
730 and incorporation of these reagents into IBEX workflow. (D) Confocal images from a 13 parameter  
731 3 cycle IBEX experiment performed on 20  $\mu\text{m}$  tissue sections from an immunized inguinal mouse  
732 LN. Cycle 1: Fluorophore-conjugated antibodies. Cycles 2-3: Oligo-conjugated antibodies, Atto550  
733 (AT550). Scale bars (400  $\mu\text{m}$ , top-left panel or 50  $\mu\text{m}$ ). Data are representative of 3 similar  
734 experiments. See Fig. S7 and Movie S9.
